# Supplementary material for: Transition metal ion-doped In2O3nanocubes: investigation of their photocatalytic degradation activity under sunlight
Source: Royal Society of Chemistry journal article supplement (doi:10.1039/d0na00694g), 2020-11-19
Supplement: d0na00694g1.pdf [file d0na00694g1.pdf]

## Transition metal ion-doped In<sub>2</sub>O<sub>3</sub> nanocubes: Investigations of their photocatalytic degradation activity under sunlight

Velayutham Shanmuganathan<sup>1</sup>, Jayaraj Santhosh Kumar<sup>1</sup>, Raman Pachaiappan<sup>2</sup>,

Paramasivam Thangadurai<sup>1,\*</sup>

<sup>1</sup>Centre for Nanoscience and Technology, Pondicherry University, Kalapet, Pondicherry, 605014, India

<sup>2</sup>Department of Biotechnology, School of Bioengineering, SRM University, Kattankulathur - 603 203, Tamilnadu, India

\*Email: thangadurai.p@gmail.com/thangaduraip.nst@pondiuni.edu.in

Table T1: Strain obtained from the Williamson-Hall fitting of the XRD data.

| S.No. | Sample                            | Strain, $\epsilon$     |
|-------|-----------------------------------|------------------------|
| 1.    | In <sub>2</sub> O <sub>3</sub>    | $4.75 \times 10^{-3}$  |
| 2.    | Cu-In <sub>2</sub> O <sub>3</sub> | $5.21 \times 10^{-3}$  |
| 3.    | Ni-In <sub>2</sub> O <sub>3</sub> | $10.71 \times 10^{-3}$ |
| 4.    | Co-In <sub>2</sub> O <sub>3</sub> | $4.85 \times 10^{-3}$  |
| 5.    | Fe-In <sub>2</sub> O <sub>3</sub> | $9.98 \times 10^{-3}$  |
| 6.    | Mn-In <sub>2</sub> O <sub>3</sub> | $4.42 \times 10^{-3}$  |

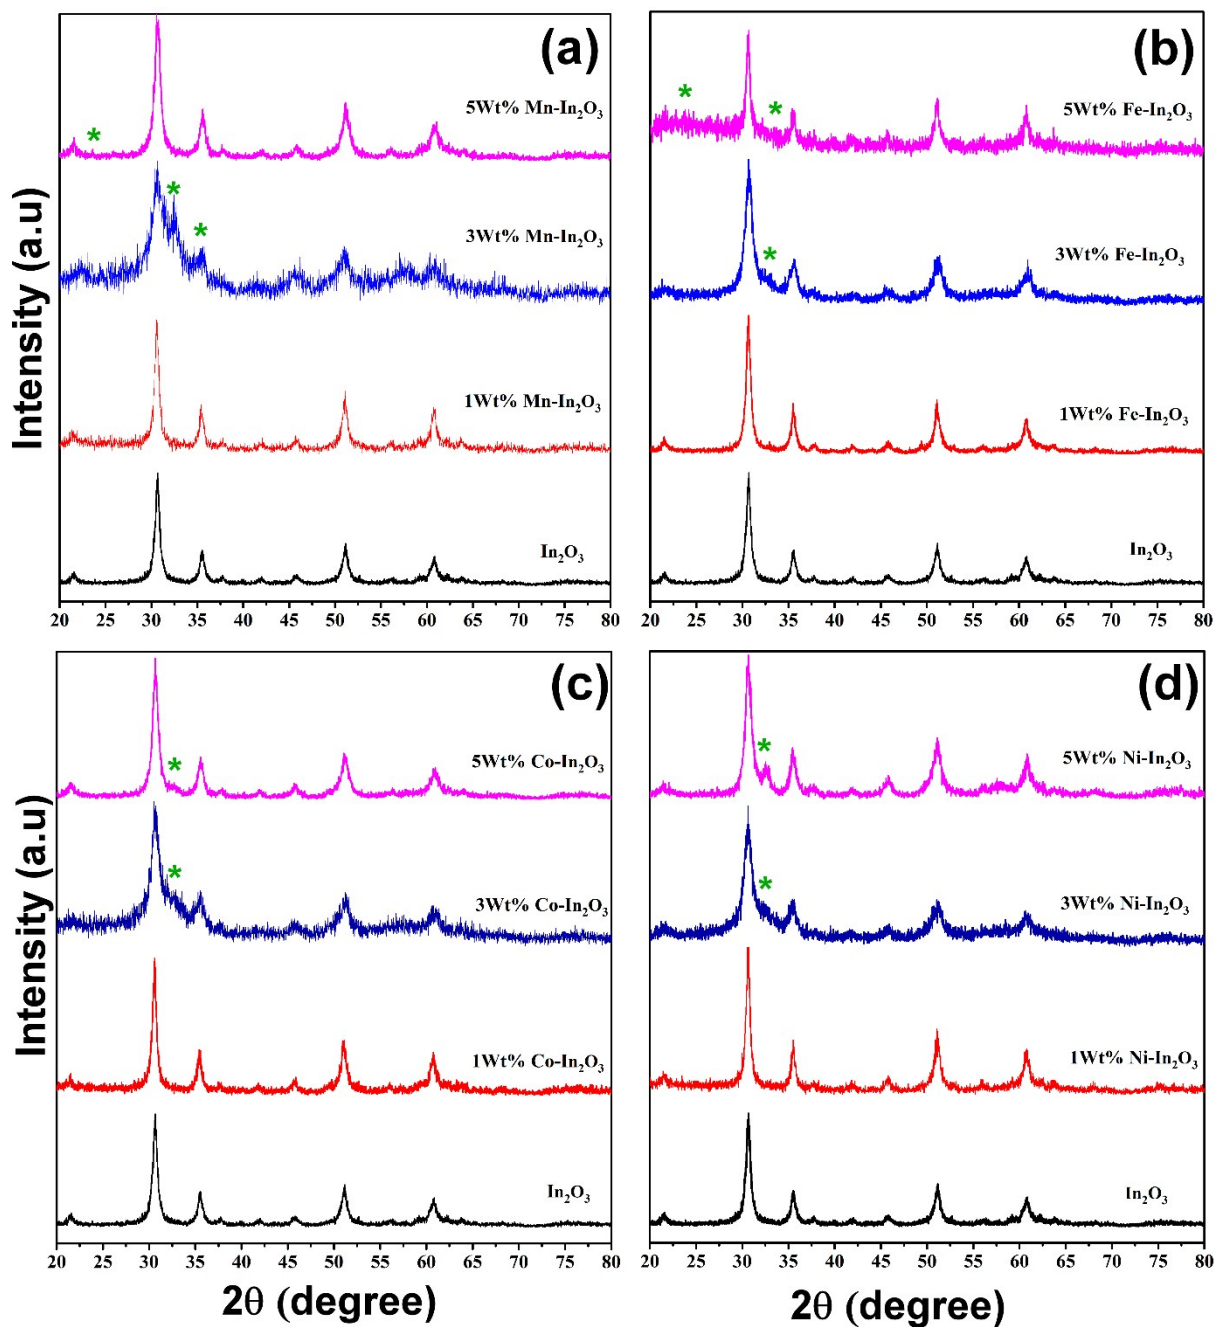

**Figure S1.** The XRD patterns of the  $\text{In}_2\text{O}_3$  for different concentration of the dopant ions. Asterisk marks the impurity phases in each sample when the concentration is increased. The XRD patterns for Mn, Fe, Co and Ni ion doped  $\text{In}_2\text{O}_3$  are given respectively in (a), (b), (c) and (d).

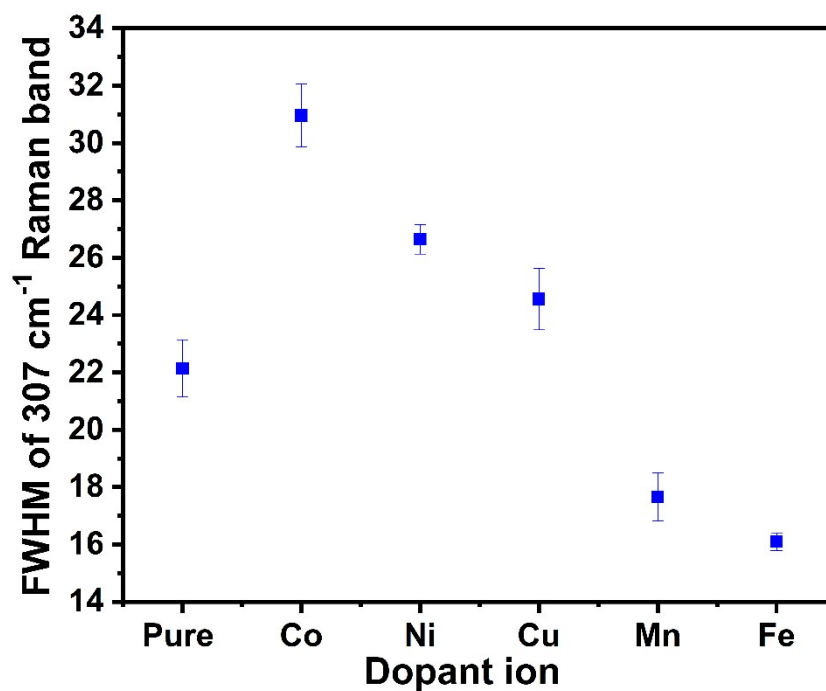

**Figure S2.** Change in FWHM of the Raman band at 307 cm<sup>-1</sup> in In<sub>2</sub>O<sub>3</sub> for various doping ions.

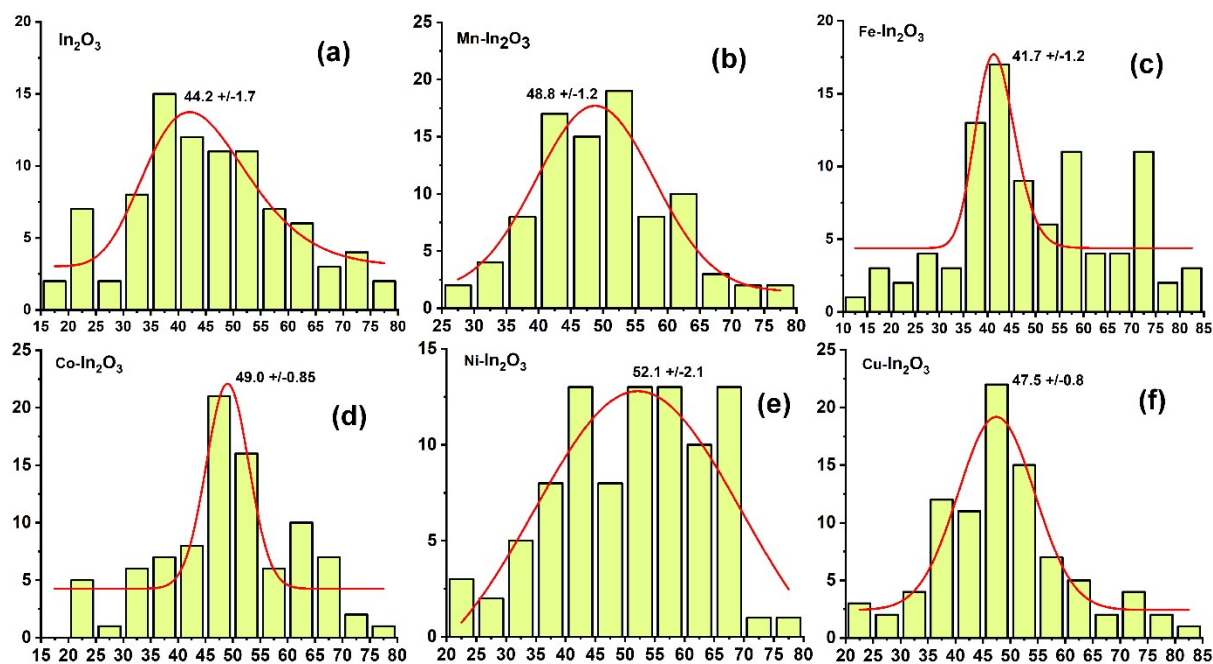

**Figure S3.** Particle size distribution in (a) In<sub>2</sub>O<sub>3</sub>, (b) 1wt% Mn-In<sub>2</sub>O<sub>3</sub>, (c) 1wt% Fe-In<sub>2</sub>O<sub>3</sub>, (d) 1wt% Co-In<sub>2</sub>O<sub>3</sub>, (e) 1wt% Ni-In<sub>2</sub>O<sub>3</sub> and (f) 1wt% Cu-In<sub>2</sub>O<sub>3</sub>.

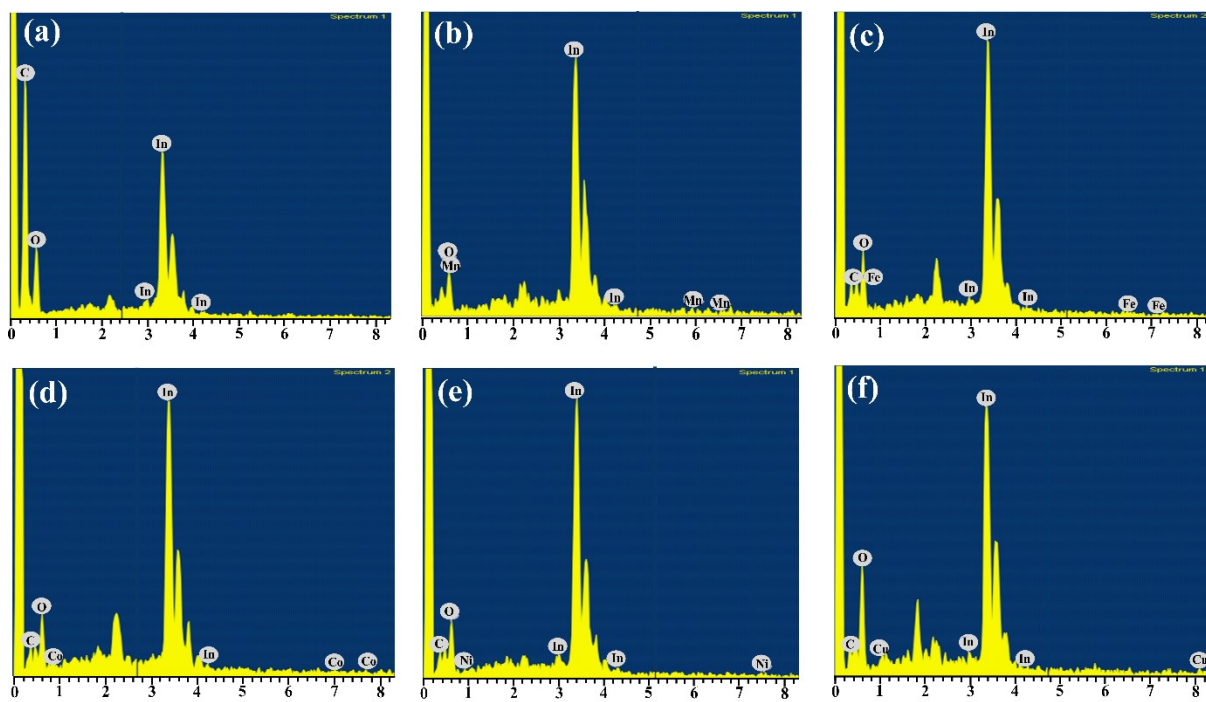

**Figure S4.** XEDS spectra analysis data from FESEM showing elemental composition of the pure and transition metal ion doped  $\text{In}_2\text{O}_3$ .

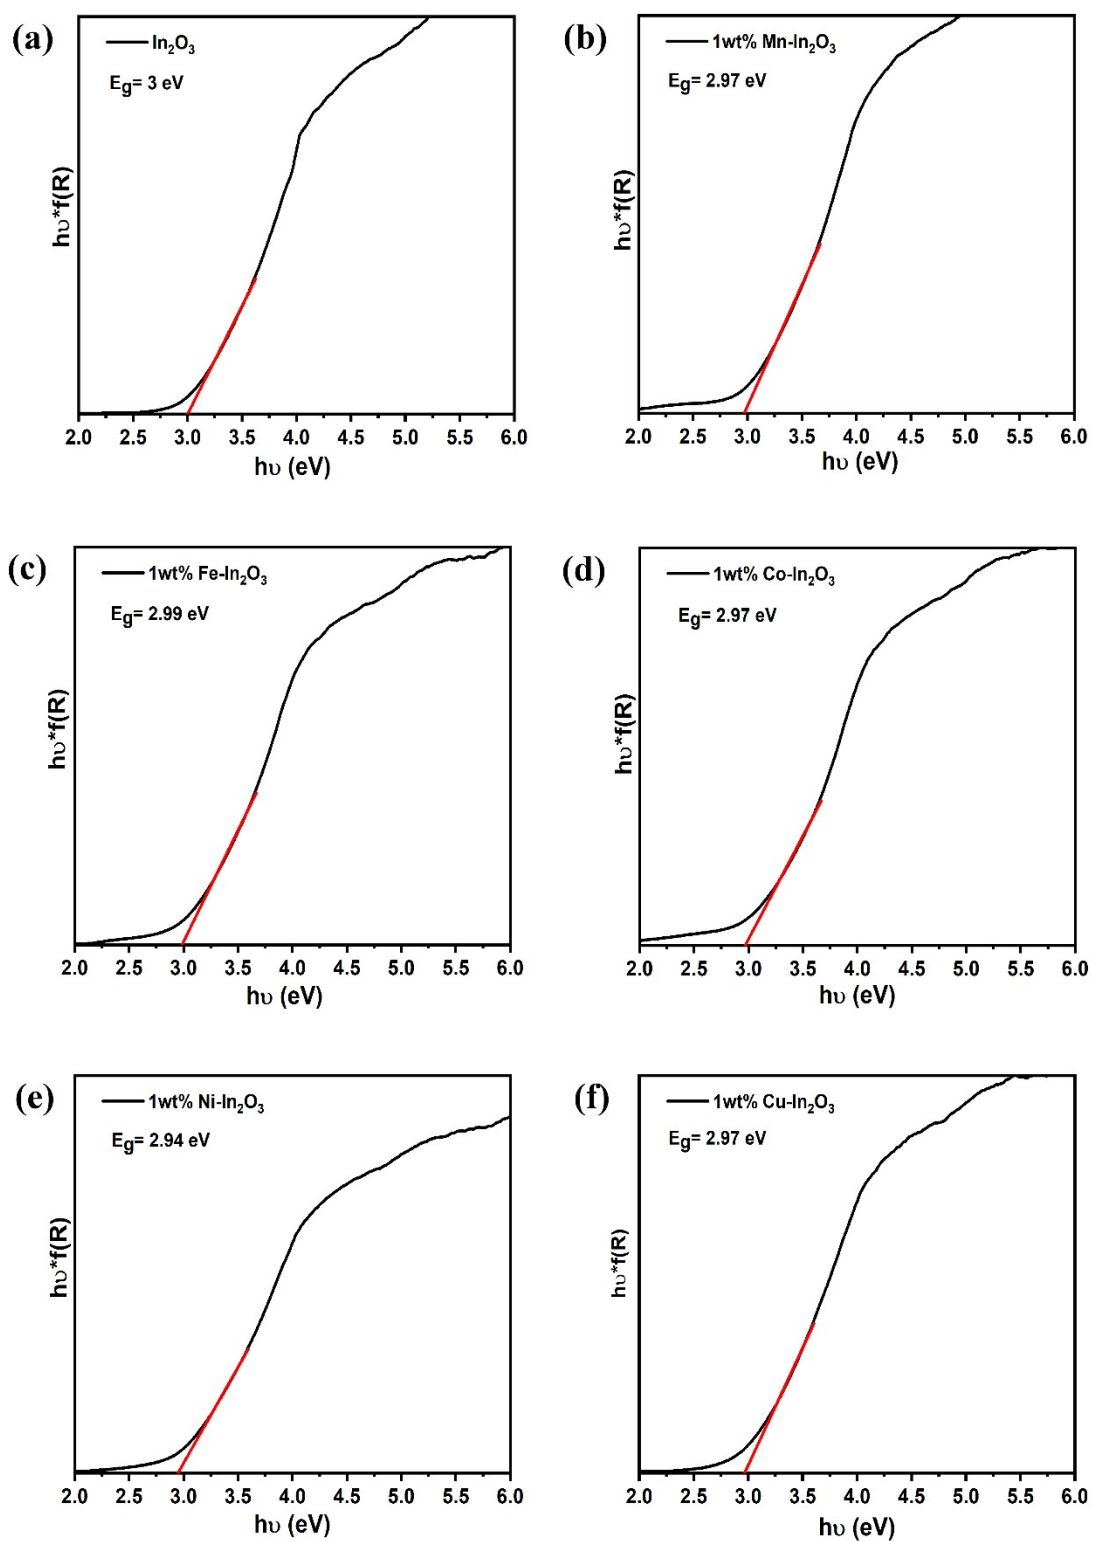

**Figure S5.** Kubelka-Munk plots for pure and different metal ions doped  $\text{In}_2\text{O}_3$  nanocubes.

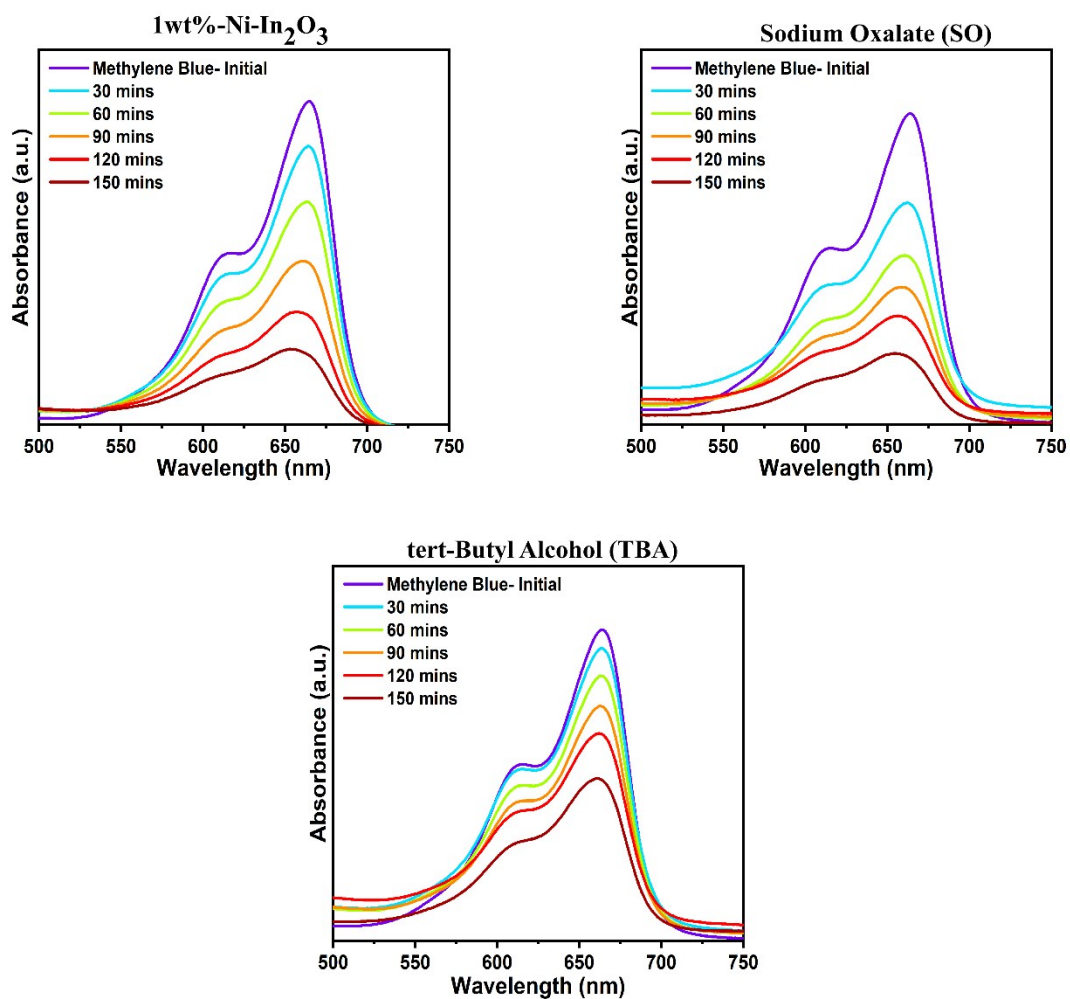

**Figure S6.** UV-vis absorption spectra of photocatalytic degradation MB under Sunlight irradiation for different time interval by 1wt%Ni-In<sub>2</sub>O<sub>3</sub> photocatalyst and also in the presence of different scavengers SO (sodium oxalate) and TBA (tert butyl alcohol) with 1wt%Ni-In<sub>2</sub>O<sub>3</sub> photocatalyst.

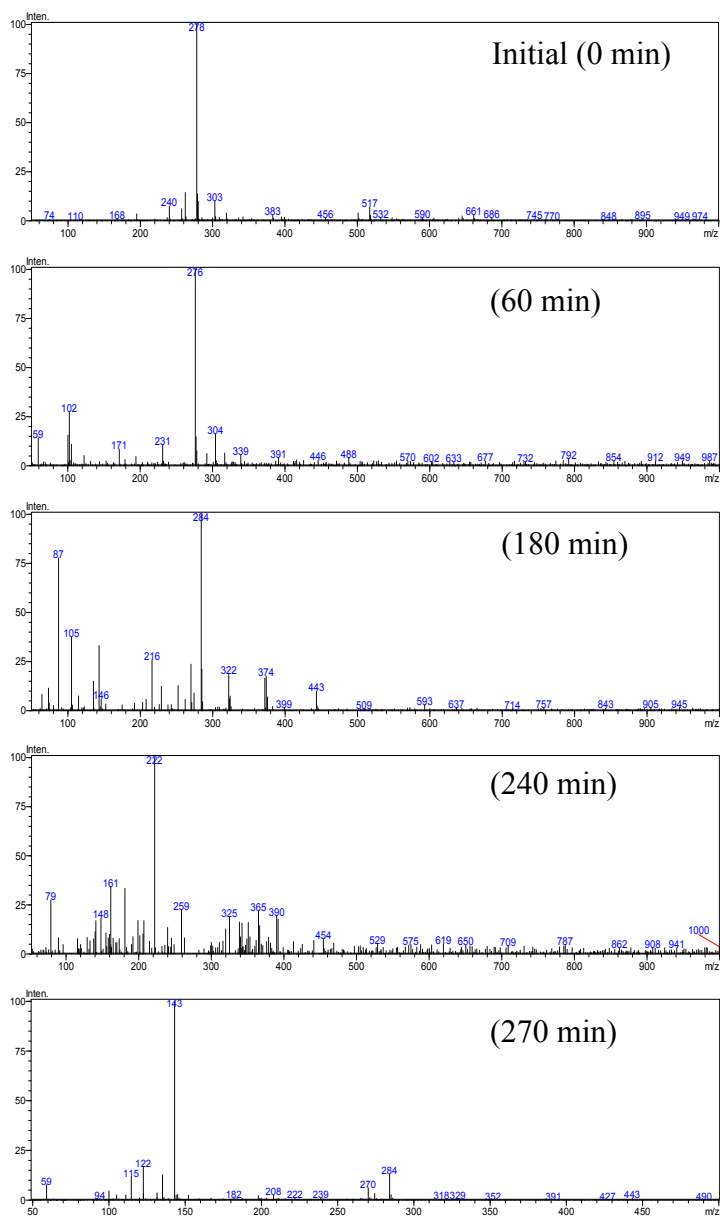

**Figure S7.** ESI-MS spectra of photodegradation of MB for the time period varied from 0 min to 270 minutes in the presence of 1 wt% Ni-In<sub>2</sub>O<sub>3</sub> photocatalyst.

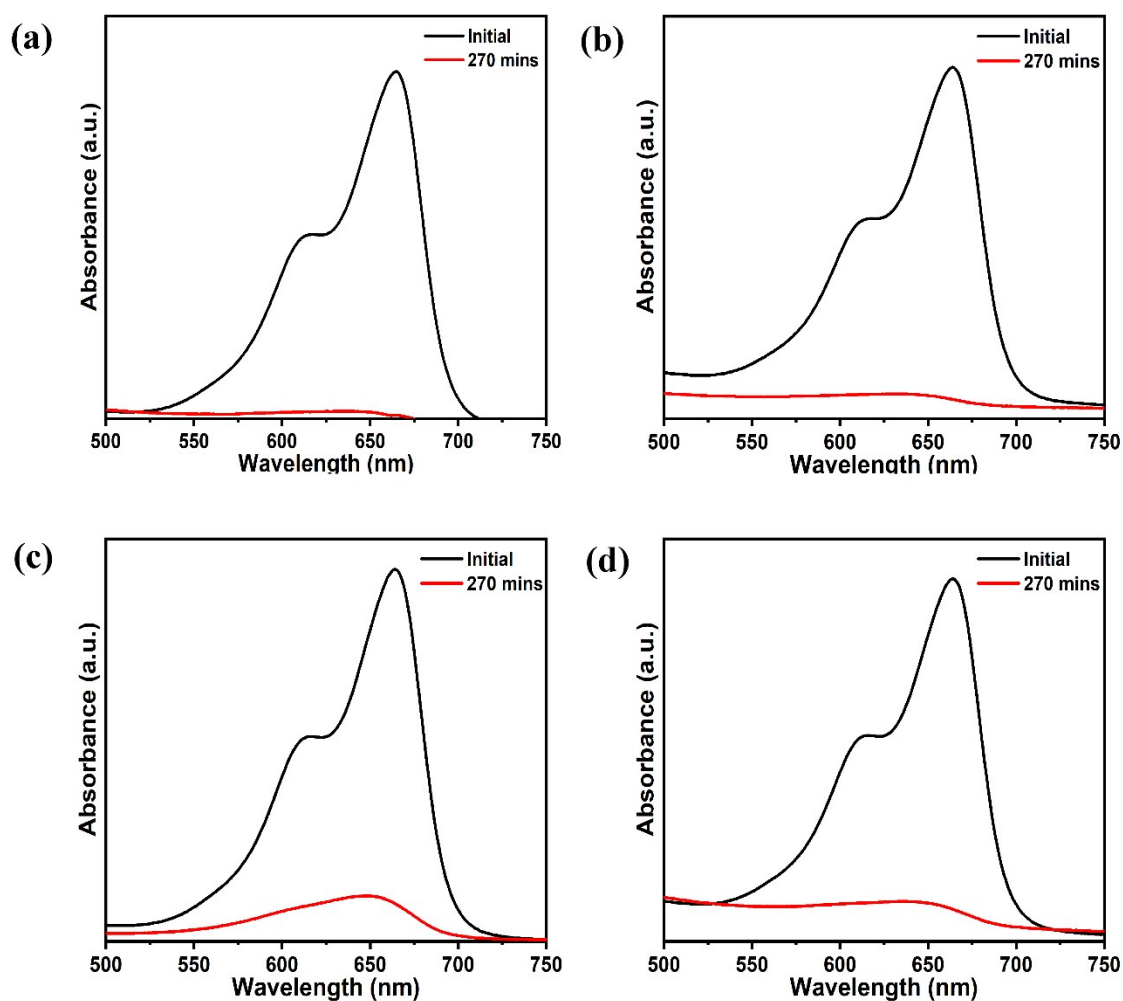

**Figure S8.** UV-vis absorption spectra of photodegradation of MB before and 270 minutes of visible light irradiation in the presence of 1wt% Ni-In<sub>2</sub>O<sub>3</sub> photocatalyst for three different consecutive cycles. (a) 1<sup>st</sup> cycle, (b) 2<sup>nd</sup> cycle (c) 3<sup>rd</sup> cycle and (d) 4<sup>th</sup> cycle of photocatalysis reaction.

### Acknowledgements

This work was financially supported by the DST-SERB (EMR/2016/005795) and UGC-DAE-CSR (CSRKN/CRS-89/2016-17/1130) research projects. The Central Instrumentation Facility of Pondicherry University is gratefully acknowledged.
